# Supplementary material for: Causal effects of lipid-lowering therapies on aging-related outcomes and risk of cancers: a drug-target Mendelian randomization study
Source: Aging (Albany NY). 2023 Dec 19;15(24):15228–42. doi: 10.18632/aging.205347 (PMC10781452; doi:10.18632/aging.205347)
Supplement: Supplementary Figure 1 [file aging-15-205347-s001.pdf]

## SUPPLEMENTARY FIGURE

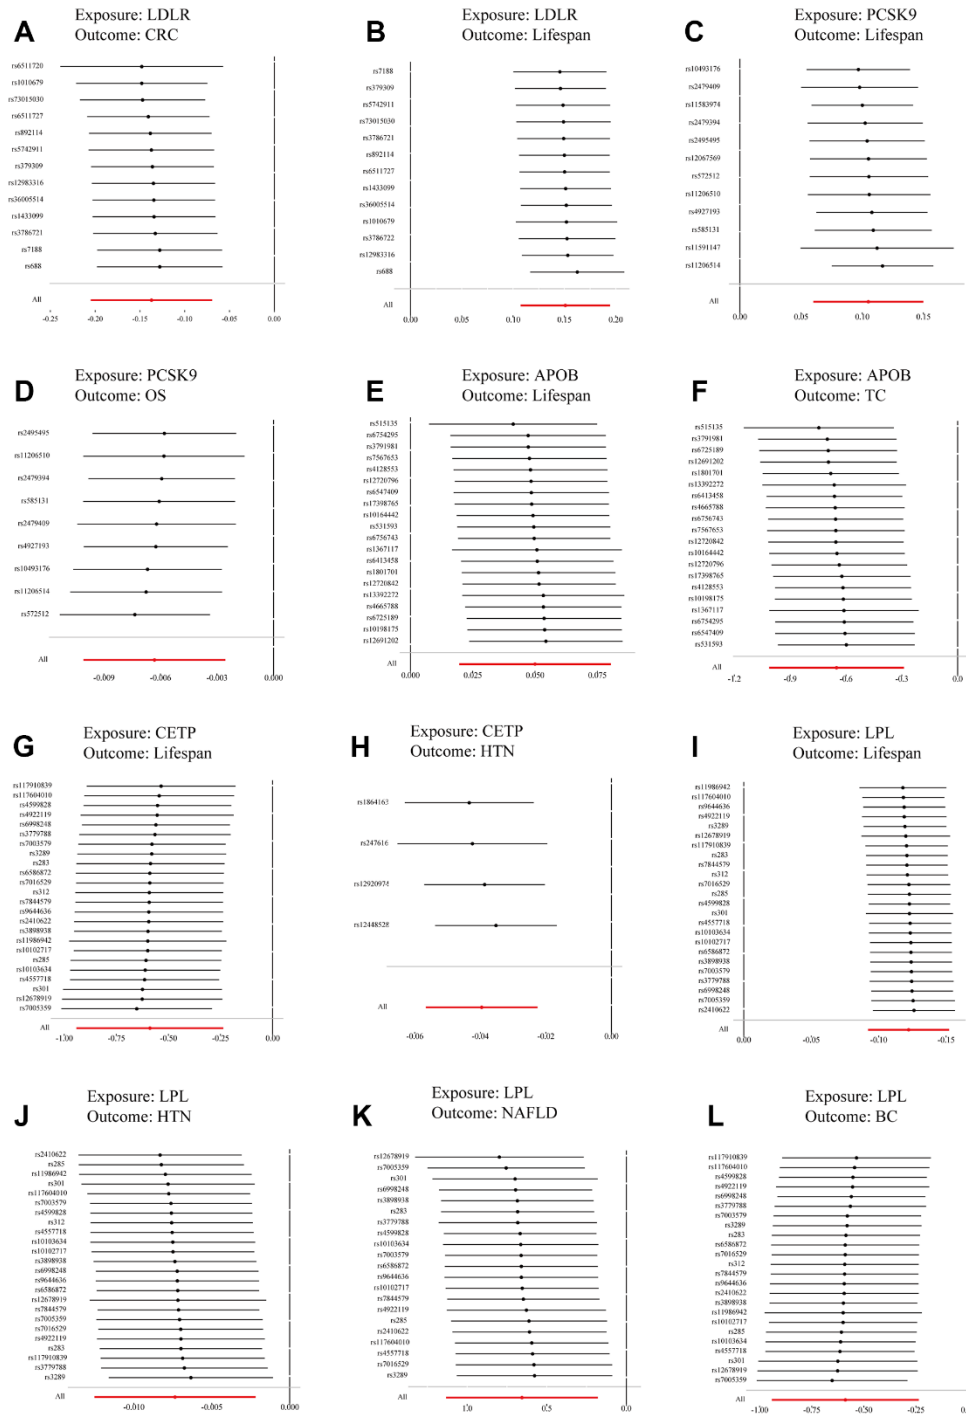

**Supplementary Figure 1. Leave-one-out plots for the causal effects of representative lipid-lowering drug target genes (Exposure) that had a causal relationship with the different diseases (outcomes).** (A) Causal effects of LDLR on CRC; (B) Causal effects of LDLR on lifespan; (C) Causal effects of PCSK9 on lifespan; (D) Causal effects of PCSK9 on OS; (E) Causal effects of APOB on lifespan; (F) Causal effects of APOB on TC; (G) Causal effects of CETP on lifespan; (H) Causal effects of CETP on HTN; (I) Causal effects of LPL on lifespan; (J) Causal effects of LPL on HTN; (K) Causal effects of LPL on NAFLD; (L) Causal effects of LPL on BC.
