# Supplementary material for: Causal effects of lipid-lowering therapies on aging-related outcomes and risk of cancers: a drug-target Mendelian randomization study
Source: Aging (Albany NY). 2023 Dec 19;15(24):15228–42. doi: 10.18632/aging.205347 (PMC10781452; doi:10.18632/aging.205347)
Supplement: Supplementary Table 2 [file aging-15-205347-s003.xlsx]

## Sheet: Table S2
Supplementary Table 2. Genetically instrumented lipid-lowering genetics variants of target genes in Longevity-related traits.
GENE	SNP	Chr	Pos	Effect allele	Other allele	Exposure (Drug target genes)					Outcome (Human Lifespan)				F	F_Mean
						EAF	Beta	SE	p		EAF	Beta	SE	p
LDLR (13 SNPs)	rs1010679	19	11207102	C	T	0.1794	-0.1017	0.0063	3.51075e-54		0.219606	0.0149607	0.00478253	0.00175879	253.655	144.181
	rs12983316	19	11114352	G	A	0.1689	-0.0514	0.0052	7.44389e-22		0.163446	0.00509257	0.0054583	0.350822	122.198
	rs1433099	19	11242658	C	T	0.7098	-0.0357	0.0043	2.51015e-16		0.72947	0.00506439	0.00435905	0.245313	90.0785
	rs36005514	19	11190764	A	G	0.0752	-0.0626	0.0096	7.06106e-10		0.0738127	0.00758452	0.00791997	0.338242	45.2876
	rs3786721	19	11146499	C	T	0.5383	-0.0468	0.0038	2.89001e-31		0.558134	0.00808401	0.00389845	0.0381123	178.308
	rs3786722	19	11161537	A	C	0.2427	-0.0754	0.0043	5.52077e-63		0.254736	0.0106351	0.00444952	0.0168408	358.806
	rs379309	19	11284302	T	C	0.4974	-0.0313	0.0039	1.39091e-13		0.50243	0.00930352	0.00391739	0.0175522	81.7533
	rs5742911	19	11243445	G	A	0.2678	-0.0606	0.0057	4.82948e-24		0.310507	0.0103447	0.00423626	0.0146087	111.877
	rs6511727	19	11315817	G	T	0.6148	-0.0266	0.0038	1.84417e-11		0.594573	0.00485797	0.00394851	0.218573	57.0707
	rs688	19	11227602	T	C	0.4472	-0.054	0.0037	1.01088e-43		0.449201	0.00222881	0.00387162	0.564833	240.815
	rs7188	19	11275139	C	A	0.3259	-0.0521	0.0043	9.38858e-31		0.327804	0.0110821	0.0041162	0.00709576	172.61
	rs73015030	19	11207516	A	G	0.02507	-0.1517	0.0148	2.61577e-22		0.0385108	0.0253283	0.0106951	0.0178738	93.528
	rs892114	19	11266584	G	A	0.7731	-0.0353	0.0047	7.62957e-13		0.784869	0.0065307	0.00474968	0.169139	68.3638
HMGCR (7 SNPs)	rs10066707	5	74560579	A	G	0.4169	-0.0497	0.0054	2.97303e-19		0.371418	0.00313535	0.0040196	0.435382	108.077	151.079
	rs10515198	5	74641560	A	G	0.1029	-0.0599	0.0061	5.98963e-22		0.0999858	-0.00200898	0.00658496	0.7603	114.683
	rs12659791	5	74757758	C	T	0.1557	-0.0433	0.005	1.422e-18		0.154885	-0.00356694	0.00539571	0.508568	85.328
	rs12916	5	74656539	C	T	0.4314	-0.0733	0.0038	7.79112e-78		0.400128	0.00478758	0.00392679	0.222765	444.936
	rs3804231	5	74696779	A	G	0.1319	-0.0642	0.0053	1.88408e-29		0.128176	0.0123829	0.00579701	0.0326731	163.462
	rs3857388	5	74620377	C	T	0.128	-0.0421	0.0059	2.2009e-11		0.114648	0.00026006	0.00609977	0.965993	68.4511
	rs72633962	5	74569028	C	T	0.1412	-0.06	0.0072	3.32736e-15		0.129124	0.0141384	0.00577378	0.0143362	72.6181
PCSK9 (12 SNPs)	rs10493176	1	55538552	G	T	0.1148	-0.0776	0.0102	2.53513e-14		0.0835299	0.0210079	0.00732717	0.00414227	105.448	188.774
	rs11206510	1	55496039	C	T	0.1544	-0.0831	0.005	2.38013e-53		0.188283	0.00827541	0.00498372	0.0968162	312.174
	rs11206514	1	55516004	A	C	0.6108	-0.0507	0.0041	9.94947e-33		0.6098	-0.00283052	0.0040038	0.479593	211.68
	rs11583974	1	55551718	A	G	0.03034	-0.0646	0.0117	3.95103e-09		0.0483987	0.0247461	0.0100253	0.0135737	24.5489
	rs11591147	1	55505647	T	G	0.01715	-0.497	0.018	8.57038e-143		0.0182368	0.0477138	0.0153278	0.00185268	650.056
	rs12067569	1	55528629	A	G	0.0343	-0.0885	0.01	1.96607e-17		0.0349016	0.00886781	0.0114205	0.437465	85.2738
	rs2479394	1	55486064	A	G	0.715	-0.0386	0.0041	1.58416e-19		0.720082	0.00696412	0.00430012	0.105335	105.085
	rs2479409	1	55504650	A	G	0.6675	-0.0642	0.0041	2.51478e-50		0.653041	0.0107648	0.00409979	0.00864719	317.033
	rs2495495	1	55496556	C	T	0.8654	-0.0342	0.0059	3.51998e-08		0.871732	0.00611642	0.00603096	0.310501	44.2641
	rs4927193	1	55509872	C	T	0.1306	-0.0352	0.0056	4.26874e-11		0.138717	-0.00236374	0.00561888	0.673991	48.6927
	rs572512	1	55517344	T	C	0.3456	-0.0478	0.0047	5.30884e-26		0.367284	0.00462568	0.00421273	0.272194	155.764
	rs585131	1	55524116	T	C	0.8153	-0.0637	0.005	2.69898e-35		0.822024	0.00312279	0.00503655	0.535241	205.273
NPC1L1 (3 SNPs)	rs2073547	7	44582331	G	A	0.1939	-0.0485	0.0049	1.92309e-21		0.190898	-0.00167401	0.0050099	0.738274	125.014	94.5279
	rs217386	7	44600695	A	G	0.4077	-0.0363	0.0038	1.20393e-19		0.425322	0.00907436	0.00391559	0.0204769	110.178
	rs7791240	7	44602589	C	T	0.09103	-0.0425	0.0065	1.83802e-10		0.0926447	-0.00521413	0.00667317	0.434592	48.3911
LPL (21 SNPs)	rs10102717	8	177735	T	C	0.409	-0.0313	0.0034	9.66273e-20		0.394849	0.00033536	0.00395138	0.932364	84.2177	240.75
	rs10103634	8	164013	A	G	0.3298	-0.0517	0.0036	8.0891e-46		0.321612	0.00467317	0.0041121	0.255771	194.023
	rs117604010	8	81223	A	G	0.01979	-0.1371	0.017	3.11172e-15		0.0199574	0.0425329	0.0148291	0.00412798	59.2727
	rs12678919	8	177750	G	A	0.1214	-0.1702	0.0056	1.8197e-199		0.0993098	0.0226205	0.00645957	0.000462013	1105.24
	rs2410622	8	172471	C	T	0.8562	-0.0537	0.0051	1.2031e-26		0.83515	-0.00230729	0.00535991	0.666852	122.555
	rs283	8	169866	T	C	0.2348	-0.037	0.0044	1.70412e-16		0.204736	0.00804942	0.00493073	0.102574	83.6029
	rs285	8	172996	T	C	0.5277	-0.054	0.0034	4.80065e-56		0.475937	0.00592404	0.00390841	0.129591	251.817
	rs301	8	177741	C	T	0.4274	-0.1089	0.0039	1.86209e-167		0.2713	0.0128466	0.00462709	0.00549649	1037.73
	rs3289	8	169504	C	T	0.0277	-0.1447	0.0111	3.67113e-33		0.0281015	0.0286007	0.0118551	0.0158421	191.387
	rs3779788	8	177663	T	C	0.1306	-0.0916	0.0049	4.65801e-76		0.14887	0.00827077	0.00551215	0.133495	339.16
	rs3898938	8	177607	T	C	0.4393	-0.0244	0.0034	1.21899e-12		0.482689	-0.00197006	0.00388332	0.611935	52.1056
	rs4557718	8	170599	C	T	0.1266	-0.0578	0.0059	3.26437e-24		0.131108	0.00421342	0.00592651	0.477119	126.132
	rs4599828	8	177753	C	T	0.533	-0.0241	0.0034	1.59001e-11		0.536716	0.0013442	0.00391316	0.731217	51.4098
	rs4922119	8	172289	T	C	0.4499	-0.0708	0.0034	1.66994e-95		0.434909	0.0113725	0.00388959	0.00345758	428.534
	rs6586872	8	177730	G	A	0.7441	-0.0339	0.0038	4.08602e-19		0.753894	-0.00020776	0.00452879	0.96341	77.8174
	rs6998248	8	91013	T	C	0.8681	-0.0473	0.0079	6.74497e-10		0.874262	-0.00203337	0.00591015	0.730812	46.6534
	rs7003579	8	177716	C	T	0.785	-0.0255	0.004	4.71596e-10		0.794353	-0.00493852	0.00482273	0.305831	39.0153
	rs7005359	8	141560	G	A	0.2058	-0.0797	0.005	1.86209e-57		0.187608	0.00545435	0.00506498	0.281535	294.55
	rs7016529	8	154015	C	T	0.01319	-0.1911	0.014	3.57026e-35		0.020789	0.0224289	0.0148854	0.13187	146.555
	rs7844579	8	174654	C	T	0.5264	-0.0215	0.0034	2.99799e-10		0.53553	0.00639698	0.00387397	0.0986825	40.2632
	rs9644636	8	177570	G	T	0.2639	-0.0415	0.0039	2.02023e-27		0.277301	0.0113864	0.0043727	0.00921518	118.893
ANGPTL3 (4 SNPs)	rs1168032	1	177790	G	A	0.6781	-0.0683	0.0035	1.48594e-80		0.644916	0.00229559	0.00403505	0.569415	362.806	209.485
	rs12039115	1	177765	T	C	0.1095	-0.0471	0.0051	6.53431e-21		0.136708	-0.00490353	0.00572669	0.391855	76.9395
	rs4587594	1	177772	A	G	0.31	-0.0694	0.0035	3.50268e-82		0.349846	0.00132114	0.00404235	0.7438	367.04
	rs67537755	1	55254	A	G	0.2573	-0.0384	0.0064	5.96307e-09		0.265145	0.00038498	0.00440525	0.930361	31.1558
APOC3 (10 SNPs)	rs12294259	11	172242	T	C	0.05937	-0.219	0.0069	1.79061e-200		0.0650667	0.0208912	0.00784824	0.00777031	927.621	298.705
	rs1263167	11	146678	G	A	0.1807	-0.0423	0.0049	5.59242e-17		0.194246	0.00310529	0.00491852	0.527814	77.7501
	rs180326	11	161659	T	G	0.6372	-0.0839	0.0036	6.26614e-108		0.650456	0.0126307	0.00403636	0.00175272	527.846
	rs2187126	11	177773	G	A	0.05409	-0.0543	0.0069	2.90269e-15		0.0573905	0.0182682	0.00846187	0.0308586	53.6523
	rs5110	11	81720	A	C	0.06464	-0.156	0.0124	2.13698e-34		0.0915409	-0.00016396	0.00703401	0.981403	241.189
	rs533556	11	175877	C	A	0.6306	-0.0596	0.0035	1.61102e-59		0.640499	0.00358562	0.00402156	0.372608	291.539
	rs61905084	11	84257	C	T	0.1649	-0.0563	0.0059	2.548e-20		0.182168	0.00827607	0.00500781	0.0984056	73.6175
	rs6589574	11	177776	G	A	0.8786	-0.1283	0.0054	3.02691e-113		0.913976	0.00543598	0.00696162	0.434891	626.454
	rs7943309	11	172721	A	G	0.03958	-0.0605	0.0087	1.15505e-11		0.0338464	0.00341816	0.0107598	0.750728	48.0772
	rs888246	11	158795	T	C	0.08179	-0.0707	0.0058	8.98669e-31		0.112237	0.00499945	0.00620464	0.420381	119.308
CETP (4 SNPs)	rs12448528	16	56985555	G	A	0.7731	-0.037	0.0052	1.05706e-12		0.781447	0.00642207	0.00476129	0.177398	81.3426	115.029
	rs12920974	16	56993025	T	G	0.3153	-0.0324	0.0056	2.96203e-08		0.285139	0.00957666	0.00435179	0.0277625	37.5557
	rs1864163	16	56997233	A	G	0.2678	-0.0437	0.0045	7.96893e-21		0.260797	0.0104708	0.00442443	0.0179527	128.455
	rs247616	16	56989590	T	C	0.2929	-0.0547	0.0041	2.56626e-37		0.324493	0.0129417	0.00418285	0.00197492	212.763
APOB (18 SNPs)	rs10164442	2	21205563	G	A	0.3206	-0.0286	0.0039	7.78395e-13		0.320379	0.00343178	0.00413228	0.406266	61.6676	266.882
	rs10198175	2	21133883	G	A	0.91557	-0.0768	0.0063	1.44911e-32		0.890748	-0.0042162	0.00632909	0.505308	157.878
	rs12691202	2	21249716	T	C	0.05145	-0.0966	0.0114	8.22243e-19		0.0417506	-0.0144557	0.0102488	0.158401	99.455
	rs12720796	2	21261998	C	A	0.02243	-0.0909	0.0141	1.68e-10		0.0192122	0.0190538	0.0142912	0.182451	55.7186
	rs12720842	2	21257927	C	T	0.02111	-0.0993	0.0116	1.87715e-15		0.0364869	-0.00251478	0.0105833	0.812177	65.7592
	rs13392272	2	21217490	T	C	0.4129	-0.0875	0.0037	1.45881e-118		0.498195	0.00228359	0.0038807	0.556231	644.371
	rs1367117	2	21263900	A	G	0.2876	-0.1186	0.004	9.48418e-183		0.335423	0.0055697	0.00410055	0.174375	1002.95
	rs17398765	2	21270751	G	A	0.0686	-0.0916	0.0076	3.53671e-32		0.0762552	0.00804235	0.00769916	0.29622	180.438
	rs3791981	2	21245367	G	A	0.1201	-0.0939	0.0067	2.03376e-41		0.0884025	0.0102153	0.0069557	0.141936	301.489
	rs4128553	2	21147179	T	C	0.09894	-0.0652	0.006	2.29985e-24		0.123862	0.00723743	0.00596004	0.224624	131.245
	rs515135	2	21286057	C	T	0.7823	-0.1394	0.0048	1.08893e-178		0.818074	0.0123067	0.00501629	0.0141531	1152.88
	rs531593	2	21348574	G	A	0.06464	-0.0694	0.0078	7.03396e-18		0.067453	0.0052861	0.0080201	0.509827	97.4824
	rs6413458	2	21231592	A	G	0.02375	-0.094	0.0139	2.18801e-10		0.0218771	-0.00324306	0.0141341	0.818519	65.1978
	rs6547409	2	21190209	T	C	0.05937	-0.1226	0.0087	8.19408e-45		0.0547097	0.00990167	0.0088964	0.265709	281
	rs6725189	2	21219001	T	G	0.2348	-0.0604	0.0045	5.62859e-40		0.199046	-0.00256013	0.00480756	0.594365	227.089
	rs6754295	2	21206183	G	T	0.2586	-0.0628	0.0042	1.63983e-47		0.232438	0.00677208	0.00457187	0.13854	262.036
	rs6756743	2	21301892	T	C	0.04222	-0.0553	0.0092	4.96798e-09		0.0484616	0.00483631	0.00914188	0.596786	40.5316
	rs7567653	2	21276962	A	G	0.03694	-0.1145	0.0112	3.36822e-26		0.0448299	0.0126789	0.00944736	0.179576	150.486
