# Supplementary material for: Causal effects of lipid-lowering therapies on aging-related outcomes and risk of cancers: a drug-target Mendelian randomization study
Source: Aging (Albany NY). 2023 Dec 19;15(24):15228–42. doi: 10.18632/aging.205347 (PMC10781452; doi:10.18632/aging.205347)
Supplement: Supplementary Table 3 [file aging-15-205347-s004.xlsx]

## Sheet: Table S3
Supplementary Table 3. Sensitivity analysis of genetically proxied lipid-lowering variants on human lifespan.
Traits	Methods	Lifespan						Telemere Length
		SNPs	Beta	95% CI	SE	p		SNPs	Beta	95% CI	SE	p
LDL-C Target
LDLR	Inverse variance weighted	13	0.151	(0.107 to 0.194)	0.022	1.08e-11		12	0.005	(-0.015 to 0.025)	0.01	0.638
	MR Egger	13	0.125	(0.016 to 0.233)	0.055	0.0459		12	0.016	(-0.019 to 0.052)	0.018	0.383
	Weighted median	13	0.152	(0.093 to 0.210)	0.03	4.04e-07		12	0.007	(-0.017 to 0.032)	0.012	0.554
	Maximum likelihood	13	0.154	(0.080 to 0.229)	0.038	0.00158		12	0.007	(-0.017 to 0.031)	0.012	0.587
HMGCR	Inverse variance weighted	7	0.08	(0.008 to 0.151)	0.036	0.0284		6	0.008	(-0.032 to 0.048)	0.02	0.694
	MR Egger	7	0.245	(-0.128 to 0.619)	0.19	0.254		6	0.094	(-0.140 to 0.328)	0.119	0.475
	Weighted median	7	0.065	(-0.015 to 0.145)	0.041	0.113		6	0.004	(-0.038 to 0.046)	0.022	0.849
	Maximum likelihood	7	0.058	(-0.039 to 0.156)	0.05	0.286		6	0.002	(-0.052 to 0.057)	0.028	0.933
PCSK9	Inverse variance weighted	12	0.105	(0.060 to 0.150)	0.023	4.55e-06		11	0.015	(-0.006 to 0.035)	0.011	0.161
	MR Egger	12	0.106	(0.031 to 0.182)	0.039	0.0204		11	0.037	(0.003 to 0.070)	0.017	0.0592
	Weighted median	12	0.096	(0.043 to 0.150)	0.027	0.000388		11	0.032	(0.005 to 0.058)	0.014	0.0199
	Maximum likelihood	12	0.1	(0.044 to 0.157)	0.029	0.00511		11	0.031	(0.003 to 0.059)	0.014	0.0539
NPC1L1	Inverse variance weighted	3	0.06	(-0.155 to 0.275)	0.11	0.582		3	0.073	(0.005 to 0.141)	0.035	0.0349
	MR Egger	3	-0.95	(-2.161 to 0.261)	0.618	0.367		3	0.271	(-0.250 to 0.793)	0.266	0.494
	Weighted median	3	0.033	(-0.134 to 0.199)	0.085	0.702		3	0.074	(-0.004 to 0.153)	0.04	0.0623
	Maximum likelihood	3	-0.057	(-0.313 to 0.200)	0.131	0.707		3	0.082	(-0.026 to 0.190)	0.055	0.275
APOB	Inverse variance weighted	20	0.05	(0.020 to 0.080)	0.016	0.00128		5	0.022	(-0.006 to 0.051)	0.015	0.129
	MR Egger	20	0.073	(-0.015 to 0.161)	0.045	0.12		5	-0.024	(-0.196 to 0.148)	0.088	0.8
	Weighted median	20	0.065	(0.022 to 0.108)	0.022	0.00323		5	0.018	(-0.012 to 0.049)	0.016	0.241
	Maximum likelihood	20	0.082	(0.034 to 0.129)	0.024	0.00346		5	0.023	(-0.009 to 0.054)	0.016	0.233
CETP	Inverse variance weighted	4	0.236	(0.136 to 0.336)	0.051	3.72e-06		-	-		-	-
	MR Egger	4	0.208	(-0.294 to 0.709)	0.256	0.502		-	-		-	-
	Weighted median	4	0.238	(0.116 to 0.359)	0.062	0.000122		-	-		-	-
	Maximum likelihood	4	0.238	(0.095 to 0.380)	0.073	0.0467		-	-		-	-
TG Target
LPL	Inverse variance weighted	24	0.122	(0.092 to 0.152)	0.015	1.62e-15		3	0.007	(-0.048 to 0.061)	0.028	0.814
	MR Egger	24	0.16	(0.103 to 0.217)	0.029	1.5e-05		3	-0.021	(-0.181 to 0.138)	0.081	0.837
	Weighted median	24	0.125	(0.084 to 0.166)	0.021	1.81e-09		3	0.018	(-0.018 to 0.053)	0.018	0.33
	Maximum likelihood	24	0.127	(0.082 to 0.172)	0.023	1.2e-05		3	0.026	(-0.014 to 0.065)	0.02	0.331
ANGPTL3	Inverse variance weighted	4	0.012	(-0.060 to 0.085)	0.037	0.739		3	-0.018	(-0.057 to 0.022)	0.02	0.384
	MR Egger	4	0.096	(-0.223 to 0.414)	0.162	0.616		3	0.07	(-0.224 to 0.365)	0.15	0.721
	Weighted median	4	0.023	(-0.056 to 0.101)	0.04	0.573		3	-0.014	(-0.056 to 0.029)	0.022	0.528
	Maximum likelihood	4	0.024	(-0.068 to 0.117)	0.047	0.643		3	-0.013	(-0.062 to 0.035)	0.025	0.638
APOC3	Inverse variance weighted	10	0.081	(0.042 to 0.120)	0.02	4.67e-05		5	0.046	(0.010 to 0.082)	0.018	0.0133
	MR Egger	10	0.043	(-0.038 to 0.125)	0.042	0.328		5	0.067	(-0.009 to 0.144)	0.039	0.183
	Weighted median	10	0.077	(0.024 to 0.130)	0.027	0.00415		5	0.043	(0.012 to 0.074)	0.016	0.00615
	Maximum likelihood	10	0.084	(0.019 to 0.149)	0.033	0.0314		5	0.05	(0.017 to 0.084)	0.017	0.0409
