# Supplementary material for: Causal effects of lipid-lowering therapies on aging-related outcomes and risk of cancers: a drug-target Mendelian randomization study
Source: Aging (Albany NY). 2023 Dec 19;15(24):15228–42. doi: 10.18632/aging.205347 (PMC10781452; doi:10.18632/aging.205347)
Supplement: Supplementary Table 4 [file aging-15-205347-s005.xlsx]

## Sheet: Table S4
Supplementary Table 4. Results of heterogeneity and pleiotropy tests for the causal effects of lipid-lowering gene targets on human lifespan.
Outcome	Exposure	MR Estimate	95%CI_low	95%CI_high	p	FDR	Q	Q_pval	Egger Intercept	p	SNPs	F-Mean
Parental lifespan	LDLR	0.150934	0.107	0.194	1.08379e-11	2.826e-10	4.96115	0.959264	0.0016	0.61	13	144.181
	HMGCR	0.0795476	0.008	0.151	0.0283659	0.106162	7.32163	0.292124	0.0099	0.41	7	151.079
	PCSK9	0.10506	0.06	0.15	4.55145e-06	5.95292e-05	13.803	0.244088	0.0001	0.97	12	188.774
	NPC1L1	0.060273	-0.155	0.275	0.582441	0.755157	5.29291	0.070902	-0.0423	0.35	3	94.5279
	APOB	0.0499939	0.02	0.08	0.00128347	0.00692966	13.8235	0.793882	0.0021	0.59	4	266.882
	CETP	0.235963	0.136	0.336	3.7237e-06	5.30945e-05	0.433439	0.933251	0.0029	0.14	18	115.029
	LPL	0.122218	0.092	0.152	1.62243e-15	8.478e-14	21.2691	0.564656	0.0051	0.65	21	240.75
	ANGPTL3	0.0123607	-0.06	0.085	0.739287	0.85311	1.06054	0.786608	0.0039	0.34	4	209.485
	APOC3	0.0807702	0.042	0.12	4.67e-05	0.000458244	9.43865	0.397807	0.0013	0.92	10	298.705
Telomere length	LDLR	0.00482477	-0.0152994	0.0249489	0.638419	0.796039	13.6696	0.251819	-0.00109055	0.447861	12	251.918
	HMGCR	0.00798487	-0.0317424	0.0477122	0.693622	0.827496	6.59894	0.252217	0.0052729	0.504465	6	162.038
	PCSK9	0.0147619	-0.00588656	0.0354104	0.161144	0.34626	8.81129	0.550102	-0.0021868	0.134568	11	201.912
	NPC1L1	0.0730398	0.00517107	0.140909	0.0349155	0.119115	1.57385	0.455243	-0.00831537	0.59008	3	94.5279
	APOB	0.0221004	-0.00640572	0.0506066	0.128621	0.311585	4.69638	0.319892	0.00477734	0.62819	5	332.518
	CETP*	NA	NA	NA	NA	NA	NA	NA	NA	NA	NA	NA
	LPL	0.00657036	-0.0482746	0.0614153	0.81436	0.895888	6.0258	0.0491489	0.00388684	0.765991	3	470.527
	ANGPTL3	-0.0176517	-0.0573903	0.0220869	0.383961	0.60288	0.353065	0.838172	-0.00577707	0.660116	3	268.928
	APOC3	0.0457524	0.00953464	0.0819701	0.0132868	0.0580028	6.56249	0.160896	-0.00313269	0.566429	5	346.658
