# Supplementary material for: Causal effects of lipid-lowering therapies on aging-related outcomes and risk of cancers: a drug-target Mendelian randomization study
Source: Aging (Albany NY). 2023 Dec 19;15(24):15228–42. doi: 10.18632/aging.205347 (PMC10781452; doi:10.18632/aging.205347)
Supplement: Supplementary Table 5 [file aging-15-205347-s006.xlsx]

## Sheet: Table S5
Supplementary Table 5. Sensitivity analysis of genetically proxied lipid-lowering variants on age-related noncancerous diseases.
Traits	Methods	Coronary atherosclerosis					Major CHD events					Hypertension					T2D					NAFLD					Osteoporosis
		nsnp	OR	lo_ci	up_ci	pval	nsnp	OR	lo_ci	up_ci	pval	nsnp	OR	lo_ci	up_ci	pval	nsnp	OR	lo_ci	up_ci	pval	nsnp	OR	lo_ci	up_ci	pval	nsnp	OR	lo_ci	up_ci	pval
LDL-C Target
LDLR	Inverse variance weighted	9	0.512459	0.420782	0.624109	2.97e-11	10	0.508802	0.399532	0.647957	4.3e-08	14	1.01535	1.00952	1.02122	2.15383e-07	14	1.15151	1.07788	1.23017	2.86e-05	14	1.02482	0.623997	1.6831	0.922847	13	1.00066	0.998179	1.00315	0.601125
	MR Egger	9	0.493252	0.290583	0.837273	0.0345152	10	0.514011	0.246296	1.07273	0.114167	14	1.01817	1.00785	1.02859	0.00468001	14	1.16188	1.03279	1.3071	0.0280697	14	1.15979	0.481522	2.79347	0.746698	13	1	0.995418	1.00461	0.999071
	Weighted median	9	0.527405	0.408619	0.680723	8.92e-07	10	0.493886	0.377605	0.645973	2.6e-07	14	1.01521	1.00722	1.02326	0.000181713	14	1.14975	1.04629	1.26343	0.00372427	14	1.08893	0.582065	2.03718	0.789784	13	1.00108	0.998007	1.00416	0.492007
	Maximum likelihood	9	0.528929	0.377953	0.740212	0.00591926	10	0.465654	0.314217	0.690075	0.00416353	14	1.01523	1.007	1.02353	0.00299855	14	1.13006	1.02019	1.25176	0.0356857	14	1.06385	0.525172	2.15505	0.866209	13	1.00092	0.997838	1.00401	0.569531
HMGCR	Inverse variance weighted	6	0.586978	0.432048	0.797466	0.00065568	6	0.58983	0.45263	0.768617	9.3e-05	7	1.00394	0.991466	1.01657	0.537496	7	1.27907	1.13016	1.44759	9.71e-05	7	0.459532	0.179549	1.17611	0.104872	7	1.00908	1.0035	1.01469	0.00139174
	MR Egger	6	1.55351	0.355776	6.78346	0.589486	6	1.26174	0.335867	4.73994	0.747964	7	1.02147	0.95359	1.09418	0.571314	7	0.876563	0.463547	1.65757	0.70201	7	0.106059	0.000884179	12.7221	0.400415	7	1.02216	0.992891	1.0523	0.199271
	Weighted median	6	0.604191	0.454693	0.802842	0.000512559	6	0.65062	0.488742	0.866113	0.00323209	7	1.00541	0.991017	1.02001	0.463442	7	1.24147	1.0621	1.45115	0.00659413	7	0.458841	0.155173	1.35678	0.159012	7	1.00824	1.00238	1.01415	0.00581822
	Maximum likelihood	6	0.572699	0.388748	0.843693	0.0371149	6	0.665324	0.465377	0.951177	0.0757372	7	1.005	0.988521	1.02176	0.575779	7	1.22243	0.996509	1.49956	0.102346	7	0.460474	0.125324	1.69191	0.287116	7	1.00826	1.001	1.01557	0.0671799
PCSK9	Inverse variance weighted	9	0.591579	0.467454	0.748664	1.25e-05	11	0.506393	0.417358	0.614421	5.31e-12	12	1.00276	0.995602	1.00997	0.450782	12	0.992979	0.920178	1.07154	0.85609	12	0.896656	0.492028	1.63404	0.72165	9	0.993703	0.989974	0.997446	0.000989434
	MR Egger	9	0.798755	0.330042	1.93312	0.633547	11	0.553652	0.266408	1.15061	0.147629	12	0.998878	0.987448	1.01044	0.852153	12	1.04302	0.923178	1.17842	0.514137	12	1.05561	0.389327	2.86213	0.917418	9	0.99711	0.983419	1.01099	0.693811
	Weighted median	9	0.555855	0.415145	0.744258	8.03e-05	11	0.469976	0.365311	0.604628	4.24e-09	12	0.999869	0.991372	1.00844	0.975987	12	1.03359	0.935816	1.14158	0.514643	12	0.958265	0.444236	2.06708	0.913448	9	0.992714	0.988185	0.997264	0.00172235
	Maximum likelihood	9	0.520114	0.331552	0.815917	0.0216253	11	0.44078	0.297892	0.652208	0.00215158	12	1.0007	0.991605	1.00989	0.882702	12	1.0546	0.95004	1.17066	0.339773	12	1.07618	0.492403	2.35207	0.857327	9	0.99297	0.98726	0.998713	0.0433438
NPC1L1	Inverse variance weighted	3	0.402974	0.254363	0.63841	0.000108074	3	0.328472	0.219176	0.492272	6.91e-08	3	1.01604	0.993304	1.03929	0.168169	-	-	-	-	-	-	-	-	-	-	-	-	-	-	-
	MR Egger	3	2.31003	0.0568647	93.8407	0.734518	3	1.34064	0.0576372	31.1835	0.885024	3	1.10168	0.926156	1.31048	0.471541	-	-	-	-	-	-	-	-	-	-	-	-	-	-	-
	Weighted median	3	0.416787	0.25887	0.671038	0.000316028	3	0.335426	0.207113	0.543233	8.97e-06	3	1.01401	0.987406	1.04134	0.304983	-	-	-	-	-	-	-	-	-	-	-	-	-	-	-
	Maximum likelihood	3	0.437654	0.232141	0.825105	0.125144	3	0.347173	0.184027	0.654954	0.0823029	3	1.00472	0.968661	1.04212	0.824277	-	-	-	-	-	-	-	-	-	-	-	-	-	-	-
APOB	Inverse variance weighted	16	0.810699	0.675318	0.973219	0.0243726	20	0.961278	0.851692	1.08496	0.522495	20	0.996936	0.991131	1.00277	0.303019	20	1.09386	1.16043	1.03111	0.0029158	20	0.900303	0.576718	1.40545	0.643951	15	0.99982	0.997653	1.00199	0.870816
	MR Egger	16	0.418502	0.263019	0.665898	0.00249337	20	0.64903	0.477556	0.882076	0.0128496	20	1.01501	0.999795	1.03046	0.0690785	20	1.12681	1.33557	0.950684	0.185457	20	1.0937	0.305725	3.91261	0.891986	15	1.00248	0.996395	1.0086	0.439462
	Weighted median	16	0.818577	0.684616	0.97875	0.0281228	20	0.942811	0.814391	1.09148	0.430532	20	0.999076	0.991425	1.00679	0.813593	20	1.12212	1.21346	1.03766	0.00390265	20	0.901649	0.500505	1.6243	0.730287	15	0.999786	0.99702	1.00256	0.879471
	Maximum likelihood	16	0.798625	0.643066	0.991815	0.0599924	20	0.910582	0.791025	1.04821	0.207685	20	0.998518	0.990881	1.00621	0.709183	20	1.11491	1.20784	1.02913	0.0153634	20	0.971096	0.494826	1.90578	0.932945	15	0.999749	0.996382	1.00313	0.88626
CETP	Inverse variance weighted	3	0.407104	0.260945	0.63513	7.48e-05	3	0.74463	0.470188	1.17926	0.20873	4	0.961198	0.944973	0.977702	5.21e-06	4	0.864793	1.04747	0.713973	0.13737	4	0.167791	0.0247225	1.13879	0.0677034	4	1.00196	0.995264	1.0087	0.566839
	MR Egger	3	4.25746	0.121931	148.657	0.570772	3	1.50904	0.0382516	59.5319	0.862475	4	0.990724	0.909789	1.07886	0.850152	4	0.804656	2.09791	0.308627	0.700132	4	27.3297	0.00258701	289017	0.556505	4	0.993475	0.960676	1.02739	0.739124
	Weighted median	3	0.389362	0.229517	0.660528	0.000468885	3	0.728379	0.42714	1.24207	0.244461	4	0.964269	0.945018	0.983911	0.000405535	4	0.891968	1.13011	0.70401	0.34368	4	0.191793	0.0298778	1.23117	0.0817232	4	1.00133	0.993644	1.00907	0.735837
	Maximum likelihood	3	0.318236	0.140113	0.722802	0.111683	3	0.691365	0.375249	1.27378	0.358115	4	0.965685	0.942539	0.989398	0.0666775	4	0.89592	1.1931	0.672763	0.506681	4	0.23037	0.0261091	2.03264	0.27808	4	1.00106	0.991589	1.01062	0.841251
TG Target
LPL	Inverse variance weighted	24	0.611969	0.552428	0.677928	5.29e-21	23	0.63684	0.572668	0.708202	8.29e-17	24	1.00739	1.00219	1.01261	0.00527122	22	0.710542	0.649398	0.777443	9.81e-14	21	0.519176	0.322347	0.83619	0.00702409	20	1.00237	1.00019	1.00456	0.0334188
	MR Egger	24	0.591185	0.485943	0.719219	2.85e-05	23	0.693446	0.566483	0.848865	0.00190346	24	1.01133	1.00149	1.02127	0.0342215	22	0.792588	0.663767	0.946409	0.0183261	21	0.411244	0.170625	0.99119	0.0624081	20	1.00233	0.998047	1.00664	0.300666
	Weighted median	24	0.602966	0.525414	0.691965	5.93e-13	23	0.637284	0.548119	0.740955	4.66e-09	24	1.00762	1.00032	1.01497	0.0406309	22	0.714625	0.647103	0.789192	3.24e-11	21	0.654543	0.339603	1.26155	0.205522	20	1.00269	0.999908	1.00548	0.0580948
	Maximum likelihood	24	0.604437	0.510538	0.715606	5.89e-06	23	0.622391	0.530316	0.730453	7.69e-06	24	1.0079	0.999592	1.01627	0.0752373	22	0.704554	0.63189	0.785573	2.97e-06	21	0.694773	0.317266	1.52147	0.373348	20	1.00266	0.999356	1.00598	0.131133
ANGPTL3	Inverse variance weighted	4	0.990247	0.769043	1.27508	0.939432	4	0.78194	0.595977	1.02593	0.0758582	4	1.00295	0.990447	1.01561	0.645432	4	1.00641	1.1599	0.873231	0.929681	4	0.538768	0.181624	1.5982	0.264926	4	0.999598	0.994668	1.00455	0.87324
	MR Egger	4	1.73636	0.603121	4.99892	0.413983	4	2.05312	0.691672	6.09436	0.324406	4	1.02326	0.968754	1.08083	0.496887	4	1.33246	2.47054	0.71865	0.45838	4	0.36595	0.00335222	39.9496	0.715398	4	1.00296	0.981555	1.02483	0.813504
	Weighted median	4	1.04311	0.779326	1.39618	0.776602	4	0.867268	0.645772	1.16474	0.343906	4	1.00557	0.991383	1.01995	0.443747	4	1.03482	1.21754	0.879514	0.679961	4	0.564728	0.161867	1.97024	0.370101	4	1.00003	0.994651	1.00544	0.991589
	Maximum likelihood	4	1.04541	0.768551	1.42201	0.795629	4	0.871499	0.638148	1.19018	0.450659	4	1.00538	0.988648	1.0224	0.575326	4	1.03639	1.23921	0.866773	0.721235	4	0.584979	0.13589	2.51822	0.523585	4	1	0.99339	1.00666	0.999048
APOC3	Inverse variance weighted	9	0.665175	0.533572	0.829237	0.000289207	9	0.776309	0.625512	0.963459	0.0215721	6	1.00864	0.998964	1.0184	0.0802499	10	0.967164	0.865105	1.08126	0.557336	10	0.712794	0.409642	1.24029	0.230918	9	1.00004	0.997455	1.00263	0.97676
	MR Egger	9	1.13989	0.694074	1.87205	0.620904	9	1.07085	0.593975	1.93058	0.826431	6	1.00936	0.985944	1.03333	0.480054	10	1.00613	0.785578	1.2886	0.962593	10	1.1751	0.368902	3.74316	0.791794	9	0.999887	0.99447	1.00533	0.968738
	Weighted median	9	0.701737	0.572611	0.859982	0.000640402	9	0.798114	0.639752	0.995676	0.0456734	6	1.00891	0.999122	1.0188	0.0745074	10	0.968989	0.87317	1.07532	0.553188	10	0.671375	0.332244	1.35666	0.266949	9	0.99966	0.996298	1.00303	0.843134
	Maximum likelihood	9	0.667364	0.524426	0.84926	0.0110444	9	0.779134	0.594646	1.02086	0.107848	6	1.00914	0.999036	1.01934	0.136563	10	0.975827	0.869408	1.09527	0.68761	10	0.7358	0.327239	1.65445	0.476929	9	0.999715	0.996131	1.00331	0.88011
