# Supplementary material for: Causal effects of lipid-lowering therapies on aging-related outcomes and risk of cancers: a drug-target Mendelian randomization study
Source: Aging (Albany NY). 2023 Dec 19;15(24):15228–42. doi: 10.18632/aging.205347 (PMC10781452; doi:10.18632/aging.205347)
Supplement: Supplementary Table 6 [file aging-15-205347-s007.xlsx]

## Sheet: Table S6
Supplementary Table 6. Results of heterogeneity and pleiotropy tests for the causal effects of lipid-lowering gene targets on age-related noncancerous diseases.
Outcome	Exposure	MR Estimate	95%CI_low	95%CI_high	p	FDR	Q	Q_pval	Egger Intercept	p	SNPs	F-Mean
CAS	LDLR	0.512459	0.420782	0.624109	2.97e-11	6.66129e-10	7.06007	0.530166	-0.00103136	0.636401	9	105.857
	HMGCR	0.586978	0.432048	0.797466	0.000656	0.00396123	10.7106	0.0574303	0.0583798	0.257523	6	157.145
	PCSK9	0.591579	0.467454	0.748664	1.25e-05	0.000140179	11.4781	0.176054	0.0171452	0.510833	9	121.977
	NPC1L1	0.402974	0.254363	0.63841	0.000108	0.000807429	2.7652	0.250926	0.0754446	0.522525	3	94.5279
	APOB	0.810699	0.675318	0.973219	0.0244	0.0953488	21.8951	0.0807952	-0.0511351	0.0106474	16	266.882
	CETP	0.407104	0.260945	0.63513	7.48e-05	0.000652422	36.8614	0.382815	0.000559545	0.899826	3	82.4512
	LPL	0.611969	0.552428	0.677928	5.29e-21	8.3053e-19	10.8708	0.984468	-0.00255035	0.689342	24	240.75
	ANGPTL3	0.990247	0.769043	1.27508	0.939	0.963549	1.97117	0.578411	0.0339727	0.395908	4	209.485
	APOC3	0.665175	0.533572	0.829237	0.000289	0.00197274	10.5361	0.160172	0.0455999	0.0565714	9	228.826
Major CHD events	LDLR	0.508802	0.399532	0.647957	4.3e-08	8.43875e-07	15.0973	0.0882985	0.00054047	0.977612	10	119.353
	HMGCR	0.58983	0.45263	0.768617	9.3e-05	0.000762235	7.51808	0.184872	0.0456101	0.314999	6	157.145
	PCSK9	0.506393	0.417358	0.614421	5.31e-12	1.66734e-10	12.6192	0.245751	0.00544569	0.809059	11	146.84
	NPC1L1	0.328472	0.219176	0.492272	6.91e-08	1.20541e-06	1.75428	0.415972	0.0607138	0.539375	3	94.5279
	APOB	0.961278	0.851692	1.08496	0.522	0.7065	26.8906	0.107227	-0.0363595	0.0155685	20	266.882
	CETP	0.74463	0.470188	1.17926	0.209	0.424705	0.152669	0.926506	0.0266811	0.768984	3	82.4512
	LPL	0.63684	0.572668	0.708202	8.29e-17	6.50765e-15	19.3163	0.625724	0.00632875	0.343147	23	249.189
	ANGPTL3	0.78194	0.595977	1.02593	0.0759	0.209058	3.27123	0.351667	0.0584113	0.215184	4	209.485
	APOC3	0.776309	0.625512	0.963459	0.0216	0.0889667	14.0153	0.0509095	0.0272129	0.289333	9	228.826
Hypertension	LDLR	0.984881	0.979226	0.990568	2.15383e-07	3.3755e-06	8.7556	0.791141	-0.000241803	0.530528	14	239.565
	HMGCR	1.00394	0.991466	1.01657	0.537496	0.714483	7.56655	0.271609	0.0272129	0.289333	7	151.079
	PCSK9	1.00276	0.995602	1.00997	0.450782	0.649606	12.3369	0.338856	0.000386143	0.414637	12	188.774
	NPC1L1	1.01604	0.993304	1.03929	0.168169	0.356432	1.36642	0.504993	-0.00339504	0.525878	3	94.5279
	APOB	0.996936	0.991131	1.00277	0.303019	0.518783	23.7945	0.204152	-0.00164638	0.0230427	20	266.882
	CETP	0.961198	0.944973	0.977702	5.20935e-06	6.29208e-05	1.6773	0.641992	0.00133577	0.551258	4	115.029
	LPL	0.992668	0.987549	0.997813	0.00527122	0.0258559	22.1973	0.508371	-0.000303195	0.366435	24	240.75
	ANGPTL3	1.00295	0.990447	1.01561	0.645432	0.796039	0.748886	0.86165	-0.00122435	0.537617	4	209.485
	APOC3	1.00864	0.998964	1.0184	0.0802499	0.217093	7.15961	0.209038	-0.000106692	0.949512	6	298.705
COPD	LDLR	0.998008	0.996009	1.00001	0.0513076	0.154887	8.59246	0.283254	9.10459e-05	0.625734	8	161.415
	HMGCR	NA	NA	NA	NA	NA	NA	NA	NA	NA	NA	NA
	PCSK9	1.00005	0.997576	1.00252	0.970217	0.988896	2.03981	0.564185	0.000515457	0.297044	4	197.391
	NPC1L1*	NA	NA	NA	NA	NA	NA	NA	NA	NA	NA	NA
	APOB	1.00092	0.999129	1.00271	0.315358	0.526117	6.07885	0.193337	-0.00021763	0.32328	11	277.204
	CETP	0.998874	0.995759	1.002	0.47972	0.666903	0.463071	0.926926	-0.000231716	0.571134	3	253.667
	LPL	1.00077	0.999417	1.00212	0.265509	0.469236	8.06265	0.622717	0.000101055	0.236556	5	445.648
	ANGPTL3	1.00092	0.997225	1.00462	0.626739	0.793863	4.6659	0.0970093	0.00072032	0.276056	11	227
	APOC3	1.00032	0.997887	1.00276	0.796408	0.892657	0.422154	0.515864	-	-	3	253.667
T2D	LDLR	1.15151	1.07788	1.23017	2.86e-05	0.000299347	11.6993	0.552443	-0.000770165	0.859932	14	239.565
	HMGCR	1.27907	1.13016	1.44759	9.71e-05	0.000762235	2.56754	0.860834	0.0224908	0.289234	7	151.079
	PCSK9	0.992979	0.920178	1.07154	0.85609	0.919872	8.83245	0.637355	-0.00481335	0.336215	12	188.774
	NPC1L1	1.68599	1.27582	2.22803	0.000240055	0.00171273	0.133608	0.71472	0.00059096	0.937782	3	94.5279
	APOB	1.09386	1.03111	1.16043	0.0029158	0.0147884	12.5903	0.858868	-0.00271973	0.719363	20	266.882
	CETP	0.864793	0.713973	1.04747	0.13737	0.316309	0.632798	0.888885	0.00318498	0.894207	4	115.029
	LPL	0.710542	0.649398	0.777443	9.81e-14	3.85042e-12	36.0189	0.0217587	-0.00725334	0.179514	22	180.014
	ANGPTL3	1.00641	0.873231	1.1599	0.929681	0.960592	0.854529	0.836385	-0.0171106	0.456605	4	209.485
	APOC3	0.967164	0.865105	1.08126	0.557336	0.734866	20.9634	0.0128137	-0.00415662	0.731509	10	298.705
NAFLD	LDLR	1.02482	0.623997	1.6831	0.922847	0.959675	1.71134	0.999907	-0.0107251	0.744009	14	239.565
	HMGCR	0.459532	0.179549	1.17611	0.104872	0.279407	2.07731	0.912453	0.0872217	0.567155	7	151.079
	PCSK9	0.896656	0.492028	1.63404	0.72165	0.839659	5.41205	0.909583	-0.0150436	0.696508	12	188.774
	NPC1L1*	NA	NA	NA	NA	NA	NA	NA	NA	NA	NA	NA
	APOB	0.900303	0.576718	1.40545	0.643951	0.87694	7.16856	0.993259	-0.0178363	0.753139	20	266.882
	CETP	0.167791	0.0247225	1.13879	0.0677034	0.194395	5.21592	0.156652	0.223842	0.386188	4	115.029
	LPL	0.519176	0.322347	0.83619	0.00702409	0.0333982	18.1574	0.577039	-0.0175416	0.544064	21	232.901
	ANGPTL3	0.538768	0.181624	1.5982	0.264926	0.469236	1.33566	0.720683	0.0234972	0.883377	4	209.485
	APOC3	0.712794	0.409642	1.24029	0.230918	0.44641	3.88514	0.918808	-0.0528026	0.363798	10	298.705
AD	LDLR	1.00151	0.997369	1.00566	0.475727	0.666903	8.85492	0.78381	9.56099e-05	0.728681	14	239.565
	HMGCR	0.998911	0.990939	1.00695	0.789716	0.892302	2.70961	0.844311	-0.00104005	0.436036	7	151.079
	PCSK9	0.992327	0.984706	1.00001	0.0501987	0.154887	13.6312	0.190486	-0.000152885	0.863517	11	146.84
	NPC1L1	0.993386	0.977335	1.0097	0.424596	0.629481	0.989068	0.609855	-0.00261584	0.504251	3	94.5279
	APOB	0.996347	0.991575	1.00114	0.135207	0.316309	31.0486	0.0398801	4.023e-05	0.949496	20	266.882
	CETP	0.992587	0.980503	1.00482	0.233787	0.44641	1.50167	0.681884	-0.00064779	0.679392	4	115.029
	LPL	0.996147	0.992335	0.999975	0.0484937	0.154887	9.5839	0.983825	0.000197065	0.425907	22	253.28
	ANGPTL3	0.998928	0.98995	1.00799	0.81583	0.895888	1.03564	0.79263	-0.000632915	0.649172	4	209.485
	APOC3	0.995638	0.990973	1.00033	0.0681129	0.194395	6.10065	0.729804	9.90819e-05	0.838246	10	298.705
Osteoporosis	LDLR	1.00066	0.998179	1.00315	0.601125	0.76713	13.5096	0.333111	5.6072e-05	0.739925	13	250.799
	HMGCR	1.00908	1.0035	1.01469	0.00139174	0.00727433	9.58127	0.14343	-0.000767484	0.416362	7	151.079
	PCSK9	0.993703	0.989974	0.997446	0.000989434	0.00575085	6.55979	0.584783	-0.000200424	0.629585	9	167.268
	NPC1L1*	NA	NA	NA	NA	NA	NA	NA	NA	NA	NA	NA
	APOB	0.99982	0.997653	1.00199	0.870816	0.919872	3.44263	0.997991	-0.000240713	0.376541	15	326.734
	CETP	1.00196	0.995264	1.0087	0.566839	0.741825	0.300569	0.959921	0.000375526	0.662652	4	115.029
	LPL	1.00237	1.00019	1.00456	0.0334188	0.116529	5.73831	0.998479	2.87402e-06	0.983381	20	266.882
	ANGPTL3	0.999598	0.994668	1.00455	0.87324	0.919872	0.120267	0.989299	-0.000205018	0.783671	4	209.485
	APOC3	1.00004	0.997455	1.00263	0.97676	0.989606	1.66425	0.989633	1.61173e-05	0.952331	9	228.826
