# Supplementary material for: Causal effects of lipid-lowering therapies on aging-related outcomes and risk of cancers: a drug-target Mendelian randomization study
Source: Aging (Albany NY). 2023 Dec 19;15(24):15228–42. doi: 10.18632/aging.205347 (PMC10781452; doi:10.18632/aging.205347)
Supplement: Supplementary Table 7 [file aging-15-205347-s008.xlsx]

## Sheet: Table S7
Supplementary Table 7. Sensitivity analysis of genetically proxied lipid-lowering variants on cancers.
Traits	Methods	CRC					GC					EC					TC					BC
		nsnp	OR	lo_ci	up_ci	pval	nsnp	OR	lo_ci	up_ci	pval	nsnp	OR	lo_ci	up_ci	pval	nsnp	OR	lo_ci	up_ci	pval	nsnp	OR	lo_ci	up_ci	pval
LDL-C Target
LDLR	Inverse variance weighted	13	0.871924	0.814785	0.933069	7.39e-05	14	1.40041	0.826163	2.37379	0.211025	14	2.20412	0.952206	5.10197	0.0649456	14	0.952214	0.631449	1.43592	0.815267	14	0.644523	0.431003	0.963823	0.0323971
	MR Egger	13	0.909356	0.810368	1.02043	0.134394	14	0.665578	0.264519	1.67472	0.404148	14	2.39681	0.526975	10.9013	0.280116	14	0.961491	0.459034	2.01394	0.918808	14	0.488723	0.23493	1.01669	0.0795294
	Weighted median	Supplementary Table 7. Sensitivity analysis of genetically proxied lipid-lowering variants on cancers.	0.882456	0.809433	0.962067	0.00454673	14	1.05122	0.51946	2.12734	0.889535	14	2.58705	0.863479	7.75103	0.0895433	14	0.837352	0.489244	1.43315	0.517349	14	0.655009	0.386559	1.10989	0.115833
	Maximum likelihood	13	0.886717	0.808426	0.972589	0.0254976	14	0.996258	0.494573	2.00684	0.991787	14	2.96476	0.813527	10.8045	0.123462	14	0.814432	0.442149	1.50017	0.52163	14	0.666208	0.379552	1.16936	0.180589
HMGCR	Inverse variance weighted	7	0.968528	0.845183	1.10987	0.645448	7	0.740765	0.299233	1.8338	0.516447	7	3.14067	0.706197	13.9675	0.132809	7	0.863164	0.415241	1.79427	0.693473	7	1.2602	0.630878	2.51728	0.51239
	MR Egger	7	0.885653	0.412289	1.9025	0.76815	7	0.171369	0.00128173	22.9124	0.511598	7	0.798203	0.00025284	2519.89	0.958399	7	0.418656	0.00801424	21.8702	0.684138	7	0.343486	0.00820931	14.3718	0.599047
	Weighted median	7	0.967009	0.826558	1.13133	0.675236	7	0.61296	0.201203	1.86737	0.389143	7	2.83983	0.462305	17.4444	0.25976	7	0.781093	0.310606	1.96424	0.599506	7	1.23589	0.532506	2.86839	0.621984
	Maximum likelihood	7	0.930631	0.767285	1.12875	0.492851	7	0.57075	0.139942	2.32778	0.463985	7	2.70291	0.341773	21.376	0.382353	7	0.762857	0.25507	2.28154	0.645359	7	1.10329	0.409407	2.97319	0.852322
PCSK9	Inverse variance weighted	12	0.964784	0.893679	1.04155	0.358704	12	0.943084	0.545387	1.63078	0.833885	12	0.701184	0.320121	1.53586	0.374874	12	1.24671	0.849586	1.82947	0.259769	12	0.92767	0.632129	1.36139	0.70125
	MR Egger	12	0.971338	0.859017	1.09834	0.652696	12	1.11487	0.498849	2.49162	0.796371	12	0.817814	0.268723	2.48888	0.730551	12	0.884166	0.513749	1.52166	0.66618	12	1.12177	0.646713	1.9458	0.69121
	Weighted median	12	0.945984	0.853574	1.0484	0.289697	12	0.901945	0.505592	1.60901	0.726743	12	0.742525	0.308082	1.7896	0.507145	12	1.09478	0.698832	1.71507	0.692562	12	1.03773	0.663971	1.62188	0.870868
	Maximum likelihood	12	0.956153	0.858767	1.06458	0.430662	12	0.884629	0.484989	1.61358	0.696989	12	0.739231	0.26663	2.04952	0.573124	12	1.06522	0.677244	1.67545	0.789596	12	1.06014	0.694071	1.61928	0.791988
NPC1L1	Inverse variance weighted	3	1.21755	0.948781	1.56247	0.121903	-	-	-	-	-	3	0.220322	0.0117236	4.14052	0.312168	3	1.99678	0.375947	10.6056	0.416964	-	-	-	-	-
	MR Egger	3	1.76584	0.260924	11.9505	0.664045	-	-	-	-	-	3	0.0982907	1.29e-11	7.48455e+08	0.874437	3	0.0240185	2.39e-09	241560	0.729065	-	-	-	-	-
	Weighted median	3	1.17033	0.878998	1.55823	0.281507	-	-	-	-	-	3	0.367113	0.0145297	9.27559	0.543071	3	1.52831	0.303317	7.70061	0.607189	-	-	-	-	-
	Maximum likelihood	3	1.1469	0.812136	1.61966	0.517834	-	-	-	-	-	3	0.393765	0.0094185	16.4624	0.67301	3	1.20572	0.198857	7.31055	0.857605	-	-	-	-	-
APOB	Inverse variance weighted	20	0.948099	0.894653	1.00474	0.0718136	20	1.03909	0.663927	1.62624	0.866757	20	0.389273	0.173545	0.873164	0.0220752	20	0.521552	0.363046	0.749261	0.000428704	20	0.853081	0.605469	1.20196	0.363666
	MR Egger	20	0.866937	0.734043	1.02389	0.109855	20	1.96035	0.53077	7.24035	0.325986	20	0.317865	0.0284058	3.55695	0.364586	20	0.663122	0.230371	1.90879	0.456191	20	0.997124	0.367855	2.70285	0.995546
	Weighted median	20	0.934182	0.8633	1.01088	0.0908102	20	1.07428	0.597394	1.93186	0.810859	20	0.510602	0.187084	1.39357	0.189468	20	0.571839	0.337974	0.967531	0.0372492	20	0.855792	0.524237	1.39704	0.533411
	Maximum likelihood	20	0.922669	0.841132	1.01211	0.10449	20	1.06299	0.548405	2.06044	0.858352	20	0.525416	0.183253	1.50645	0.245827	20	0.555553	0.323891	0.95291	0.0459816	20	0.868125	0.50448	1.4939	0.615481
CETP	Inverse variance weighted	4	0.812059	0.671067	0.982674	0.0323844	3	1.39098	0.186162	10.3932	0.747744	3	0.508558	0.0184212	14.0399	0.689584	3	0.3718	0.0723478	1.9107	0.236131	3	0.482682	0.0972915	2.39468	0.37273
	MR Egger	4	0.765996	0.296353	1.97991	0.637419	3	0.000474203	4.89e-11	4601.08	0.522236	3	0.0016861	5.11e-15	5.56404e+08	0.719317	3	0.0123347	2.58e-08	5893.1	0.629152	3	0.000433238	2.02e-09	93.056	0.432978
	Weighted median	4	0.799671	0.642165	0.99581	0.0457688	3	0.720199	0.0637386	8.1377	0.790764	3	0.401289	0.00755847	21.305	0.652308	3	0.434286	0.0644169	2.92788	0.391647	3	0.286743	0.042677	1.9266	0.198693
	Maximum likelihood	4	0.784392	0.605263	1.01653	0.163685	3	0.611265	0.0355425	10.5126	0.76681	3	0.25437	0.00200269	32.3084	0.635318	3	0.577836	0.0545859	6.11685	0.693362	3	0.233274	0.0215601	2.52395	0.353633
TG Target
LPL	Inverse variance weighted	21	0.925708	0.869264	0.985817	0.0161717	24	0.653685	0.369431	1.15665	0.144247	24	0.468298	0.218919	1.00176	0.0505268	24	0.74577	0.512141	1.08598	0.126057	24	0.554984	0.39016	0.789438	0.00105632
	MR Egger	21	0.839458	0.74714	0.943184	0.00833004	24	0.731201	0.239912	2.22854	0.587446	24	0.957765	0.223796	4.09889	0.954135	24	1.07137	0.521657	2.20037	0.85279	24	0.586798	0.299134	1.1511	0.135247
	Weighted median	21	0.950091	0.869219	1.03849	0.259331	24	0.584513	0.285695	1.19588	0.141499	24	0.562492	0.209197	1.51244	0.254215	24	0.669867	0.403707	1.1115	0.120943	24	0.674575	0.428382	1.06226	0.0892618
	Maximum likelihood	21	0.95145	0.846329	1.06963	0.414599	24	0.549501	0.266703	1.13216	0.118125	24	0.650906	0.222431	1.90476	0.441155	24	0.672512	0.385813	1.17226	0.175037	24	0.661546	0.389092	1.12478	0.140703
ANGPTL3	Inverse variance weighted	4	0.825418	0.950394	0.716876	0.007646	4	0.130051	0.0415048	0.4075	0.000464248	4	0.249666	0.0381341	1.63457	0.147774	4	1.46026	0.577321	3.69353	0.423895	4	1.90468	0.795824	4.55854	0.147874
	MR Egger	4	1.05404	2.02502	0.548641	0.888969	4	0.145892	0.0012136	17.5384	0.513375	4	0.196287	7.49e-05	514.176	0.724403	4	0.439159	0.00910348	21.1854	0.71774	4	2.30521	0.0593274	89.571	0.698455
	Weighted median	4	0.835895	0.975302	0.716414	0.0227399	4	0.128593	0.0369292	0.447777	0.00127209	4	0.203593	0.0244913	1.69245	0.140742	4	1.22695	0.41456	3.63135	0.711787	4	1.81687	0.696852	4.73706	0.221981
	Maximum likelihood	4	0.838489	1.00196	0.701689	0.147936	4	0.127211	0.0304885	0.530781	0.0662402	4	0.196049	0.0191351	2.00862	0.263517	4	1.14023	0.331822	3.91812	0.848286	4	1.75579	0.621086	4.96356	0.366269
APOC3	Inverse variance weighted	10	1.09302	0.974566	1.22586	0.128569	10	1.2792	0.713235	2.29426	0.40872	10	1.56508	0.56448	4.33933	0.389283	10	0.76422	0.486194	1.20124	0.243865	10	0.923874	0.604382	1.41226	0.71459
	MR Egger	10	1.04471	0.810226	1.34706	0.744585	10	1.46355	0.385012	5.56339	0.591445	10	4.78125	0.54516	41.9332	0.195535	10	0.622517	0.233499	1.65965	0.371172	10	0.963653	0.385218	2.41065	0.938864
	Weighted median	10	1.0752	0.957454	1.20743	0.220461	10	1.44019	0.668342	3.10343	0.351717	10	1.3085	0.379364	4.51329	0.670364	10	0.769242	0.427293	1.38484	0.381795	10	0.919805	0.544792	1.55296	0.754415
	Maximum likelihood	10	0.955262	0.759512	1.20146	0.704741	10	2.32839	0.941321	5.75934	0.100635	10	1.28449	0.349729	4.71771	0.714772	10	0.718332	0.393922	1.30991	0.308532	10	0.925344	0.515868	1.65984	0.800516
