# Supplementary material for: Causal effects of lipid-lowering therapies on aging-related outcomes and risk of cancers: a drug-target Mendelian randomization study
Source: Aging (Albany NY). 2023 Dec 19;15(24):15228–42. doi: 10.18632/aging.205347 (PMC10781452; doi:10.18632/aging.205347)
Supplement: Supplementary Table 8 [file aging-15-205347-s009.xlsx]

## Sheet: Table S8
Supplementary Table 8. Results of heterogeneity and pleiotropy tests for the causal effects of lipid-lowering gene targets on cancers.
Outcome	Exposure	MR Estimate	Supplementary Table 8. Results of heterogeneity and pleiotropy tests for the causal effects of lipid-lowering gene targets on cancers.	95%CI_high	p	FDR	Q	Q_pval	Egger Intercept	p	SNPs	F-Mean
Colon and rectum	LDLR	0.871924	0.814785	0.933069	7.39076e-05	0.000652422	5.76385	0.927515	-0.00371739	0.395668	13	230.393
	HMGCR	0.968528	0.845183	1.10987	0.645448	0.796039	7.46119	0.280292	0.00532526	0.824447	7	151.079
	PCSK9	0.964784	0.893679	1.04155	0.358704	0.593295	8.3229	0.68412	-0.000659086	0.892951	12	188.774
	NPC1L1	1.21755	0.948781	1.56247	0.121903	0.308935	1.11881	0.57155	-0.0156263	0.766387	3	94.5279
	APOB	0.948099	0.894653	1.00474	0.0718136	0.201296	10.1273	0.949735	0.0082006	0.27548	20	266.882
	CETP	0.812059	0.671067	0.982674	0.0323844	0.115609	0.326836	0.954905	0.00258743	0.91333	4	115.029
	LPL	0.925708	0.869264	0.985817	0.0161717	0.0687405	17.6951	0.607484	-0.00729388	0.0654688	21	232.901
	ANGPTL3	0.825418	0.716876	0.950394	0.007646	0.035325	2.9001	0.407285	0.0149438	0.529506	4	209.485
	APOC3	1.09302	0.974566	1.22586	0.128569	0.311585	22.2023	0.00825943	0.00469969	0.702573	10	298.705
Stomach	LDLR	1.40041	0.826163	2.37379	0.211025	0.424705	13.8615	0.383667	0.0619266	0.0820538	14	239.565
	HMGCR	0.740765	0.299233	1.8338	0.516447	0.704452	1.22036	0.975867	0.087801	0.576892	7	151.079
	PCSK9	Supplementary Table 8. Results of heterogeneity and pleiotropy tests for the causal effects of lipid-lowering gene targets on cancers.	0.545387	1.63078	0.833885	0.909292	14.404	0.211437	-0.0216003	0.579101	12	188.774
	NPC1L1*	NA	NA	NA	NA	NA	NA	NA	NA	NA	-	NA
	APOB	1.03909	0.663927	1.62624	0.866757	0.919872	12.1714	0.87817	-0.0587317	0.324165	20	266.882
	CETP	1.39098	0.186162	10.3932	0.747744	0.857197	1.57857	0.454169	0.301618	0.50631	3	82.4512
	LPL	0.653685	0.369431	1.15665	0.144247	0.322722	35.0785	0.05109	-0.00829296	0.819273	24	240.75
	ANGPTL3	0.130051	0.0415048	0.4075	0.000464248	0.00291392	0.067261	0.995453	-0.00695973	0.965769	4	209.485
	APOC3	1.2792	0.713235	2.29426	0.40872	0.623427	9.91955	0.357038	-0.0138649	0.829209	10	298.705
Esophagus	LDLR	2.20412	0.952206	5.10197	0.0649456	0.192251	5.50388	0.962364	-0.00698509	0.898508	14	239.565
	HMGCR	3.14067	0.706197	13.9675	0.132809	0.316309	0.79913	0.992097	0.0821724	0.748323	7	151.079
	PCSK9	0.701184	0.320121	1.53586	0.374874	0.594697	4.82986	0.939125	-0.020003	0.710596	12	188.774
	NPC1L1	0.220322	0.0117236	4.14052	0.312168	0.526117	0.725506	0.695758	0.0347967	0.955436	3	94.5279
	APOB	0.389273	0.173545	0.873164	0.0220752	0.0889667	22.7488	0.248588	-0.0187477	0.86294	20	266.882
	CETP	0.508558	0.0184212	14.0399	0.689584	0.827496	0.68898	0.708582	0.21569	0.744028	3	82.4512
	LPL	0.468298	0.218919	1.00176	0.0505268	0.154887	13.8082	0.932233	-0.0530047	0.269941	24	240.75
	ANGPTL3	0.249666	0.0381341	1.63457	0.147774	0.322722	1.25875	0.738952	0.0145594	0.956423	4	209.485
	APOC3	1.56508	0.56448	4.33933	0.389283	0.604683	11.147	0.265767	-0.114851	0.288538	10	298.705
Liver and bile duct	LDLR	1.35444	0.626667	2.92739	0.440395	0.641083	14.5166	0.338494	-0.0943691	0.0659008	14	239.565
	HMGCR	0.342166	0.0499794	2.34252	0.274524	0.479722	13.3103	0.0383645	0.151918	0.669869	7	151.079
	PCSK9	1.30355	0.66384	2.55973	0.441317	0.641083	6.40781	0.844816	0.00893789	0.847556	12	188.774
	NPC1L1*	NA	NA	NA	NA	NA	NA	NA	NA	NA	NA	NA
	APOB	0.881359	0.46402	1.67405	0.699618	0.827496	7.38322	0.991873	-0.0279378	0.740004	20	266.882
	CETP*	NA	NA	NA	NA	NA	NA	NA	NA	NA	NA	NA
	LPL	0.950144	0.489433	1.84453	0.879893	0.921067	10.513	0.98763	0.0260793	0.529535	24	240.75
	ANGPTL3*	NA	NA	NA	NA	NA	NA	NA	NA	NA	4	209.485
	APOC3	0.584054	0.263416	1.29498	0.1856	0.384237	5.99013	0.740905	0.16187	0.0785999	10	298.705
Pancreas	LDLR	1.15549	0.685881	1.94663	0.58706	0.755402	7.18392	0.892426	-0.0498079	0.161385	14	239.565
	HMGCR	0.392272	0.155468	0.989767	0.0475036	0.154887	2.3837	0.88125	-0.101919	0.52783	7	151.079
	PCSK9	0.759425	0.468302	1.23153	0.264554	0.469236	7.55589	0.752448	0.0537278	0.128766	12	188.774
	NPC1L1*	NA	NA	NA	NA	NA	NA	NA	NA	NA	NA	NA
	APOB	1.27251	0.803838	2.01445	0.303811	0.518783	13.6477	0.80383	0.0684534	0.263583	20	266.882
	CETP	1.01279	0.128336	7.99267	0.990379	0.99	1.25791	0.533149	0.313573	0.502065	3	82.4512
	LPL	0.953234	0.59305	1.53217	0.843199	0.912766	16.3308	0.840746	-0.0392331	0.192557	24	240.75
	ANGPTL3	0.582427	0.180172	1.88276	0.366525	0.59401	0.795405	0.850566	0.111843	0.526729	4	209.485
	APOC3	0.91393	0.517199	1.61498	0.756679	0.861225	8.41329	0.493091	0.016435	0.786247	10	298.705
Lung	LDLR	0.998944	0.997199	1.00069	0.236059	0.44641	8.64689	0.65445	3.62644e-05	0.764806	12	251.918
	HMGCR	1.00145	0.998082	1.00484	0.398609	0.614147	0.523576	0.991235	0.000271181	0.666009	6	162.038
	PCSK9	0.998248	0.996099	1.0004	0.110645	0.29045	11.739	0.302901	-0.000168105	0.245488	11	201.912
	NPC1L1*	NA	NA	NA	NA	NA	NA	NA	NA	NA	NA	NA
	APOB	0.998792	0.997059	1.00053	0.172454	0.360053	19.071	0.387463	-0.00014168	0.538988	19	220.25
	CETP	0.99626	0.99132	1.00122	0.139574	0.318551	2.17429	0.537029	-0.000704646	0.328056	4	115.029
	LPL	1.00058	0.998774	1.00239	0.528407	0.708513	33.0161	0.0807858	1.90986e-05	0.872323	24	240.75
	ANGPTL3	0.996137	0.992286	1	0.0502226	0.154887	0.0384585	0.980954	-0.000187625	0.876922	3	268.928
	APOC3	0.998671	0.99656	1.00079	0.218306	0.433241	7.24228	0.510732	-0.000204099	0.339139	9	305.096
Thyroid	LDLR	0.952214	0.631449	1.43592	0.815267	0.895888	6.62004	0.920657	-0.000812216	0.975849	14	239.565
	HMGCR	0.863164	0.415241	1.79427	0.693473	0.827496	2.64214	0.852233	0.0434231	0.730185	7	151.079
	PCSK9	1.24671	0.849586	1.82947	0.259769	0.469236	10.6073	0.476721	0.0450205	0.110209	12	188.774
	NPC1L1	1.99678	0.375947	10.6056	0.416964	0.629481	2.69159	0.260333	0.190671	0.683872	3	94.5279
	APOB	0.521552	0.363046	0.749261	0.000428704	0.00280637	16.8522	0.59988	0.0222214	0.641277	20	266.882
	CETP	0.3718	0.0723478	1.9107	0.236131	0.44641	0.416737	0.811908	0.128677	0.697471	3	82.4512
	LPL	0.74577	0.512141	1.08598	0.126057	0.311585	18.7843	0.713671	-0.0267369	0.259721	24	240.75
	ANGPTL3	1.46026	0.577321	3.69353	0.423895	0.629481	0.93437	0.817127	0.0726717	0.595376	4	209.485
	APOC3	0.76422	0.486194	1.20124	0.243865	0.456048	4.90567	0.842453	0.021021	0.656392	10	298.705
Bladder	LDLR	0.644523	0.431003	0.963823	0.0323971	0.115609	13.8692	0.38312	0.0230409	0.391353	14	239.565
	HMGCR*	1.2602	0.630878	2.51728	0.51239	0.704452	3.02316	0.805935	0.0779822	0.51839	7	151.079
	PCSK9	0.92767	0.632129	1.36139	0.70125	0.827496	11.8919	0.371827	-0.024222	0.36622	12	188.774
	NPC1L1*	NA	NA	NA	NA	NA	NA	NA	NA	NA	NA	NA
	APOB	0.853081	0.605469	1.20196	0.363666	0.59401	17.1413	0.580297	-0.0144254	0.747758	20	266.882
	CETP	0.482682	0.0972915	2.39468	0.37273	0.594697	2.17446	0.33715	0.26508	0.461503	3	82.4512
	LPL	0.554984	0.39016	0.789438	0.00105632	0.00594357	16.5533	0.83058	-0.00412832	0.850869	24	240.75
	ANGPTL3	1.90468	0.795824	4.55854	0.147874	0.322722	0.675296	0.878999	-0.0115616	0.925783	4	209.485
	APOC3	0.923874	0.604382	1.41226	0.71459	0.837724	0.910914	0.999617	-0.00433889	0.921534	10	298.705
Brain	LDLR	1.41425	0.782053	2.55752	0.251509	0.465459	7.33928	0.883831	0.0227234	0.560004	14	239.565
	HMGCR	0.298324	0.10366	0.858545	0.02491	0.0953488	0.693891	0.994622	-0.0309415	0.863956	7	151.079
	PCSK9	1.56227	0.899271	2.71408	0.113369	0.290836	10.5148	0.484762	0.0603362	0.133966	12	188.774
	NPC1L1*	NA	NA	NA	NA	NA	NA	NA	NA	NA	NA	NA
	APOB	0.82786	0.490638	1.39686	0.479081	0.666903	17.3769	0.56435	-0.150661	0.0388346	20	266.882
	CETP*	NA	NA	NA	NA	NA	NA	NA	NA	NA	NA	NA
	LPL	0.487544	0.279666	0.849939	0.0112967	0.0506886	24.3356	0.385424	-0.0265949	0.449551	24	240.75
	ANGPTL3	1.6266	0.428148	6.17968	0.475	0.666903	1.01438	0.797772	0.138392	0.49569	4	209.485
	APOC3	0.840909	0.398527	1.77436	0.649245	0.796039	11.8677	0.220872	-0.0963836	0.218794	10	298.705
