# Supplementary material for: Causal effects of lipid-lowering therapies on aging-related outcomes and risk of cancers: a drug-target Mendelian randomization study
Source: Aging (Albany NY). 2023 Dec 19;15(24):15228–42. doi: 10.18632/aging.205347 (PMC10781452; doi:10.18632/aging.205347)
Supplement: Supplementary Table 9 [file aging-15-205347-s010.pdf]

**Supplementary Table 9. Statistical power for drug-target MR analyses.**

| Drug target    | R2    | Statistical power |      |      |      |              |       |              |      |     |      |      |      |
|----------------|-------|-------------------|------|------|------|--------------|-------|--------------|------|-----|------|------|------|
|                |       | Lifespan          | CAS  | CHD  | T2D  | Hypertension | NAFLD | Osteoporosis | CRC  | GC  | EC   | TC   | BC   |
| <i>LDLR</i>    | 0.11% | 98%               | 92%  | 100% | 100% | 99%          | 12%   | 90%          | 100% | 91% | 100% | 61%  | 33%  |
| <i>HMGCR</i>   | 0.10% | 74%               | 95%  | 100% | 100% | 96%          | 6%    | 99%          | 100% | 38% | 100% | 48%  | 80%  |
| <i>PCSK9</i>   | 0.15% | 72%               | 98%  | 100% | 100% | 100%         | 10%   | 96%          | 100% | 67% | 43%  | 89%  | 66%  |
| <i>NPC1L1</i>  | 0.06% | 16%               | 68%  | 100% | 100% | 93%          | -     | -            | 100% | -   | 64%  | -    | -    |
| <i>APOB</i>    | 0.14% | 86%               | 100% | 100% | 100% | 99%          | 25%   | 100%         | 100% | 93% | 25%  | 41%  | 80%  |
| <i>CETP</i>    | 0.08% | 18%               | 63%  | 99%  | 100% | 91%          | 6%    | 100%         | 99%  | 87% | 20%  | 13%  | 19%  |
| <i>LPL</i>     | 0.16% | 96%               | 82%  | 93%  | 100% | 98%          | 19%   | 100%         | 100% | 31% | 13%  | 26%  | 16%  |
| <i>ANGPTL3</i> | 0.19% | 10%               | 100% | 98%  | 100% | 88%          | 6%    | 100%         | 100% | 24% | 68%  | 100% | 100% |
| <i>APOC3</i>   | 0.19% | 70%               | 100% | 99%  | 100% | 99%          | 20%   | 100%         | 100% | 21% | 13%  | 26%  | 16%  |
